# Supplementary material for: Bioinformatics Identification of TUBB as Potential Prognostic Biomarker for Worse Prognosis in ERα-Positive and Better Prognosis in ERα-Negative Breast Cancer
Source: MDPI journal article supplement (doi:10.3390/diagnostics12092067), 2022-08-26
Supplement: s1 [file s1]

Supplementary Table S2. Shows the genes that correlate positively and negatively with *TUBB* in ER $\alpha$ -positive breast cancer patients

| Gene symbol | Pearson's correlation coefficient | p-value  | No. patients |
|-------------|-----------------------------------|----------|--------------|
| TUBBP1      | 0.7746                            | < 0.0001 | 530          |
| LSM2        | 0.6182                            | < 0.0001 | 3685         |
| STMN1       | 0.6153                            | < 0.0001 | 3685         |
| NRM         | 0.6045                            | < 0.0001 | 3685         |
| TUBA1C      | 0.5972                            | < 0.0001 | 3685         |
| KIFC1       | 0.5935                            | < 0.0001 | 3685         |
| KIF2C       | 0.5928                            | < 0.0001 | 3685         |
| TCF19       | 0.5919                            | < 0.0001 | 3685         |
| MYBL2       | 0.5869                            | < 0.0001 | 3685         |
| ORC1        | 0.5816                            | < 0.0001 | 3685         |
| ABCF1       | 0.5815                            | < 0.0001 | 3685         |
| TUBA1B      | 0.58                              | < 0.0001 | 3685         |
| CDC20       | 0.579                             | < 0.0001 | 3685         |
| RAD54L      | 0.5679                            | < 0.0001 | 3685         |
| CDCA8       | 0.5637                            | < 0.0001 | 3685         |
| MCM10       | 0.5631                            | < 0.0001 | 3685         |
| TUBA5P      | 0.496                             | < 0.0001 | 530          |
| CFL1        | 0.491                             | < 0.0001 | 3685         |
| TMSB10      | 0.472                             | < 0.0001 | 3685         |
| NUDT1       | 0.4657                            | < 0.0001 | 3685         |
| SHCBP1      | 0.4589                            | < 0.0001 | 3685         |
| GINS3       | 0.4468                            | < 0.0001 | 3685         |
| CDC6        | 0.4441                            | < 0.0001 | 3685         |
| CLIC1       | 0.4399                            | < 0.0001 | 3685         |
| SAPCD2      | 0.4368                            | < 0.0001 | 3685         |
| SAE1        | 0.4364                            | < 0.0001 | 3685         |
| SUV39H1     | 0.4249                            | < 0.0001 | 3685         |
| CENPM       | 0.4228                            | < 0.0001 | 3685         |
| PSMD2       | 0.4178                            | < 0.0001 | 3685         |
| DTYMK       | 0.4148                            | < 0.0001 | 3685         |
| NRBP1       | 0.4121                            | < 0.0001 | 3685         |
| CENPU       | 0.4102                            | < 0.0001 | 3685         |
| COLGALT1    | 0.4066                            | < 0.0001 | 3685         |
| PPIAP22     | 0.406                             | < 0.0001 | 530          |
| EME1        | 0.4059                            | < 0.0001 | 3685         |
| ECE2        | 0.4052                            | < 0.0001 | 3685         |
| ACTG1       | 0.4047                            | < 0.0001 | 3685         |
| TUBAP2      | 0.4044                            | < 0.0001 | 530          |
| HNRNPAB     | 0.4036                            | < 0.0001 | 3685         |
| ATP5MC1P4   | 0.4015                            | < 0.0001 | 530          |
| ACTB        | 0.4011                            | < 0.0001 | 3685         |
| PRC1-AS1    | 0.4008                            | < 0.0001 | 3362         |
| AIDAP2      | -0.4325                           | < 0.0001 | 530          |
| CBX7        | -0.4316                           | < 0.0001 | 3685         |

|           |         |          |      |
|-----------|---------|----------|------|
| CREBRF    | -0.4274 | < 0.0001 | 3685 |
| APH1B     | -0.4222 | < 0.0001 | 3685 |
| CYB5D2    | -0.4135 | < 0.0001 | 3685 |
| FRY       | -0.412  | < 0.0001 | 3685 |
| SGMS1-AS1 | -0.4099 | < 0.0001 | 530  |

Supplementary Table S3. Shows the genes that correlate positively and negatively with *TUBB* in ER $\alpha$ -negative breast cancer patients

| Gene symbol | Pearson's correlation coefficient | p-value  | No. patients |
|-------------|-----------------------------------|----------|--------------|
| CHEK1       | 0.6477                            | < 0.0001 | 510          |
| MDC1        | 0.6334                            | < 0.0001 | 510          |
| BAG6        | 0.6324                            | < 0.0001 | 510          |
| GMNN        | 0.6234                            | < 0.0001 | 510          |
| DEK         | 0.6234                            | < 0.0001 | 510          |
| HDAC2       | 0.6091                            | < 0.0001 | 510          |
| CCHCR1      | 0.6033                            | < 0.0001 | 510          |
| SRPK1       | 0.6028                            | < 0.0001 | 510          |
| FANCE       | 0.5892                            | < 0.0001 | 510          |
| DHX16       | 0.5834                            | < 0.0001 | 510          |
| EHMT2       | 0.5791                            | < 0.0001 | 510          |
| DAXX        | 0.5783                            | < 0.0001 | 510          |
| PSRC1       | 0.5778                            | < 0.0001 | 510          |
| USP1        | 0.5751                            | < 0.0001 | 510          |
| ATAT1       | 0.5748                            | < 0.0001 | 510          |
| MSH2        | 0.5704                            | < 0.0001 | 510          |
| NUF2        | 0.5693                            | < 0.0001 | 510          |
| PRR3        | 0.5622                            | < 0.0001 | 510          |
| SKP2        | 0.5596                            | < 0.0001 | 510          |
| RNF8        | 0.5553                            | < 0.0001 | 510          |
| DNA2        | 0.5527                            | < 0.0001 | 510          |
| MMS22L      | 0.5518                            | < 0.0001 | 510          |
| ILF2        | 0.5487                            | < 0.0001 | 510          |
| SNRPA       | 0.5476                            | < 0.0001 | 510          |
| RIOK1       | 0.5475                            | < 0.0001 | 510          |
| MSH6        | 0.5408                            | < 0.0001 | 510          |
| E2F7        | 0.534                             | < 0.0001 | 510          |
| CENPL       | 0.5002                            | < 0.0001 | 510          |
| PBK         | 0.4955                            | < 0.0001 | 510          |
| ERI3        | 0.4931                            | < 0.0001 | 510          |
| DDIAS       | 0.4771                            | < 0.0001 | 510          |
| KDM2B       | 0.4735                            | < 0.0001 | 510          |
| C1orf112    | 0.441                             | < 0.0001 | 510          |
| CHCHD3      | 0.4275                            | < 0.0001 | 510          |
| BCL11A      | 0.4164                            | < 0.0001 | 510          |
| PIP         | -0.5188                           | < 0.0001 | 510          |
| FMO5        | -0.5053                           | < 0.0001 | 510          |

|              |         |          |     |
|--------------|---------|----------|-----|
| TMBIM4       | -0.4999 | < 0.0001 | 510 |
| XBP1         | -0.4996 | < 0.0001 | 323 |
| SCUBE2       | -0.4937 | < 0.0001 | 510 |
| EFCC1        | -0.4853 | < 0.0001 | 510 |
| ABCC11       | -0.4823 | < 0.0001 | 510 |
| FAM214A      | -0.4823 | < 0.0001 | 510 |
| SLC7A8       | -0.4787 | < 0.0001 | 510 |
| LOC100505942 | -0.432  | < 0.0001 | 241 |
| RETSAT       | -0.4088 | < 0.0001 | 510 |
| PLAAT2       | -0.4085 | < 0.0001 | 510 |
| LINC00160    | -0.4076 | < 0.0001 | 428 |
| LIN7A        | -0.4068 | < 0.0001 | 510 |
| ADH1C        | -0.4006 | < 0.0001 | 510 |
